# Supplementary material
Source: PubMed Central journal article supplement (PMC8094039)
Supplement: jamaneurol-e211008-s002.pdf [file jamaneurol-e211008-s002.pdf]

\*Indicates required information. Only first name, last name, and suffix will appear in PubMed.

| <b>Group Name:* Italian MS Registry</b> |             |         |                  |             |                                          |                                                         |                                  |
|-----------------------------------------|-------------|---------|------------------|-------------|------------------------------------------|---------------------------------------------------------|----------------------------------|
| First Name, Middle Initial*             | Last Name*  | Suffix* | Academic Degrees | Institution | Location (city, state/province, country) | Role or Contribution, eg, chair, principal investigator | Subgroup, eg, Steering Committee |
| Umberto                                 | Aguglia     |         | MD               |             |                                          |                                                         |                                  |
| Maria P.                                | Amato       |         | MD               |             |                                          |                                                         |                                  |
| Roberto                                 | Balgera     |         | MD               |             |                                          |                                                         |                                  |
| Paola                                   | Banfi       |         | MD               |             |                                          |                                                         |                                  |
| Valeria                                 | Barcella    |         | MD               |             |                                          |                                                         |                                  |
| Paolo                                   | Bellantonio |         | MD               |             |                                          |                                                         |                                  |
| Roberto                                 | Bergamaschi |         | MD               |             |                                          |                                                         |                                  |
| Antonio                                 | Bertolotto  |         | MD               |             |                                          |                                                         |                                  |
| Roberto                                 | Bombardi    |         | MD               |             |                                          |                                                         |                                  |
| Ardito                                  | Bonaventura |         | MD               |             |                                          |                                                         |                                  |
| Placido                                 | Bramati     |         | MD               |             |                                          |                                                         |                                  |
| Giampaolo                               | Brichetto   |         | MD               |             |                                          |                                                         |                                  |
| Lorenzo                                 | Capone      |         | MD               |             |                                          |                                                         |                                  |
| Daniela                                 | Cargnelutti |         | MD               |             |                                          |                                                         |                                  |
| Elisabetta                              | Cartechini  |         | MD               |             |                                          |                                                         |                                  |
| Guido                                   | Cavaletti   |         | MD               |             |                                          |                                                         |                                  |
| Paola                                   | Cavalla     |         | MD               |             |                                          |                                                         |                                  |
| Luca                                    | Chiveri     |         | MD               |             |                                          |                                                         |                                  |
| Raffaella                               | Clerici     |         | MD               |             |                                          |                                                         |                                  |
| Marinella                               | Clerico     |         | MD               |             |                                          |                                                         |                                  |
| Cristoforo                              | Comi        |         | MD               |             |                                          |                                                         |                                  |
| Francesco                               | Corea       |         | MD               |             |                                          |                                                         |                                  |
| Salvatore                               | Cottone     |         | MD               |             |                                          |                                                         |                                  |
| Paola                                   | Crociani    |         | MD               |             |                                          |                                                         |                                  |
| Francesco                               | D'Andrea    |         | MD               |             |                                          |                                                         |                                  |
| Maura C.                                | Danni       |         | MD               |             |                                          |                                                         |                                  |
| Francesca                               | De Robertis |         | MD               |             |                                          |                                                         |                                  |
| Mario                                   | Di Napoli   |         | MD               |             |                                          |                                                         |                                  |
| Alessia                                 | Di Sapio    |         | MD               |             |                                          |                                                         |                                  |
| Diana                                   | Ferraro     |         | MD               |             |                                          |                                                         |                                  |
| Elisabetta                              | Ferraro     |         | MD               |             |                                          |                                                         |                                  |

Supplemental Online Content: Nonauthor Collaborators

\*Indicates required information. Only first name, last name, and suffix will appear in PubMed.

| First Name, Middle Initial* | Last Name*  | Suffix* | Academic Degrees | Institution | Location (city, state/province, country) | Role or Contribution, eg, chair, principal investigator | Subgroup, eg, Steering Committee |
|-----------------------------|-------------|---------|------------------|-------------|------------------------------------------|---------------------------------------------------------|----------------------------------|
| Maria T.                    | Ferrò       |         | MD               |             |                                          |                                                         |                                  |
| Antonio                     | Gallo       |         | MD               |             |                                          |                                                         |                                  |
| Claudio                     | Gasperini   |         | MD               |             |                                          |                                                         |                                  |
| Maurizia                    | Gatto       |         | MD               |             |                                          |                                                         |                                  |
| Paola                       | Gazzola     |         | MD               |             |                                          |                                                         |                                  |
| Franco                      | Granella    |         | MD               |             |                                          |                                                         |                                  |
| Maria G.                    | Grasso      |         | MD               |             |                                          |                                                         |                                  |
| Alessandra                  | Lugaresi    |         | MD               |             |                                          |                                                         |                                  |
| Giacomo                     | Lus         |         | MD               |             |                                          |                                                         |                                  |
| Davide                      | Maimone     |         | MD               |             |                                          |                                                         |                                  |
| Giorgia T.                  | Maniscalco  |         | MD               |             |                                          |                                                         |                                  |
| Girolama                    | Marfia      |         | MD               |             |                                          |                                                         |                                  |
| Nerina                      | Mascoli     |         | MD               |             |                                          |                                                         |                                  |
| Luca                        | Massacesi   |         | MD               |             |                                          |                                                         |                                  |
| Massimiliano                | Mirabella   |         | MD               |             |                                          |                                                         |                                  |
| Fiorella                    | Mondino     |         | MD               |             |                                          |                                                         |                                  |
| Sara                        | Montepietra |         | MD               |             |                                          |                                                         |                                  |
| Davide                      | Nauselli    |         | MD               |             |                                          |                                                         |                                  |
| Marco                       | Onofrj      |         | MD               |             |                                          |                                                         |                                  |
| Sergio                      | Parodi      |         | MD               |             |                                          |                                                         |                                  |
| Ilaria                      | Pesci       |         | MD               |             |                                          |                                                         |                                  |
| Carlo                       | Piantadosi  |         | MD               |             |                                          |                                                         |                                  |
| Carlo                       | Pozzilli    |         | MD               |             |                                          |                                                         |                                  |
| Alessandra                  | Protti      |         | MD               |             |                                          |                                                         |                                  |
| Rocco                       | Quatrate    |         | MD               |             |                                          |                                                         |                                  |
| Augusto                     | Rini        |         | MD               |             |                                          |                                                         |                                  |
| Marco                       | Rovaris     |         | MD               |             |                                          |                                                         |                                  |
| Marco                       | Salveti     |         | MD               |             |                                          |                                                         |                                  |
| Giuseppe                    | Santuccio   |         | MD               |             |                                          |                                                         |                                  |
| Elio                        | Scarpini    |         | MD               |             |                                          |                                                         |                                  |
| Leonardo                    | Sinisi      |         | MD               |             |                                          |                                                         |                                  |
| Patrizia                    | Sola        |         | MD               |             |                                          |                                                         |                                  |

Supplemental Online Content: Nonauthor Collaborators

\*Indicates required information. Only first name, last name, and suffix will appear in PubMed.

| First Name, Middle Initial* | Last Name*    | Suffix* | Academic Degrees | Institution | Location (city, state/province, country) | Role or Contribution, eg, chair, principal investigator | Subgroup, eg, Steering Committee |
|-----------------------------|---------------|---------|------------------|-------------|------------------------------------------|---------------------------------------------------------|----------------------------------|
| Daniele                     | Spitaleri     |         | MD               |             |                                          |                                                         |                                  |
| Silvia                      | Strumia       |         | MD               |             |                                          |                                                         |                                  |
| Tiziana                     | Tassinari     |         | MD               |             |                                          |                                                         |                                  |
| Simone                      | Tonietti      |         | MD               |             |                                          |                                                         |                                  |
| Valentina                   | Torri Clerici |         | MD               |             |                                          |                                                         |                                  |
| Rocco                       | Totaro        |         | MD               |             |                                          |                                                         |                                  |
| Paola                       | Valentino     |         | MD               |             |                                          |                                                         |                                  |
| Simonetta                   | Venturi       |         | MD               |             |                                          |                                                         |                                  |
| Marika                      | Vianello      |         | MD               |             |                                          |                                                         |                                  |
